# Supplementary material
Source: PubMed Central journal article supplement (PMC6168981)
Supplement: zmb999101844s1.pdf [file zmb999101844s1.pdf]

## **Supplemental Figure legends:**

**Supplemental Figure 1. Mass Spectrometry analysis of LONP1 interacting partners.** The LONP1 immunoprecipitation (IP) experiment was done using DSG-cross-linked control mitochondria followed by mass spectrometry (MS) analysis of the elution fraction. Table shows only proteins exclusively identified by MS in LONP1 IP and not in control.

**Supplemental Figure 2. Mass Spectrometry analysis of the insoluble fraction in the LONP1-depleted cell line.** Mitochondria from control and LONP1-depleted cells (4 days) were treated with DDM (n-Dodecyl- $\beta$ -D-Maltoside). The pellet fraction was further extracted with ProteaseMAX<sup>™</sup> surfactant and analyzed in solution by mass spectrometry. Table shows only proteins exclusively identified by MS in LONP1-depleted cell line (N/A) or at least 3-fold enriched compare to control.

**Supplemental Figure 3. Mass Spectrometry analysis of MPP $\beta$  interacting partners.** The MPP $\beta$  immunoprecipitation (IP) experiment was done in control mitochondria followed by mass spectrometry (MS) analysis of the elution fraction.

Supplemental Figure 1:

| Accession number | Official name | Protein mascot score |
|------------------|---------------|----------------------|
| gil83318181      | LONP1         | 2115                 |
| gil119621956     | AFG3L2        | 1152                 |
| gil119619869     | IMMT          | 1099                 |
| gil21040386      | HSPA9         | 958                  |
| gil862457        | HADHA         | 775                  |
| gil14043666      | ATAD3A        | 679                  |
| gil15991829      | HK1           | 599                  |
| gil193783699     | GOT2          | 579                  |
| gil37589015      | TRAP1         | 507                  |
| gil7657581       | SLC25A13      | 478                  |
| gil119606477     | YME1L1        | 475                  |
| gil21411235      | NDUFS1        | 449                  |
| gil6002671       | GLS           | 465                  |
| gil269914128     | OCIA1D        | 441                  |
| gil119617402     | SHMT2         | 441                  |
| gil14290586      | TIMM50        | 416                  |
| gil180928        | COREII        | 411                  |
| gil3559910       | SLC25A12      | 406                  |
| gil119604208     | CHCHD3        | 388                  |
| gil7019477       | HTRA2         | 379                  |
| gil119590169     | PYCR2         | 327                  |
| gil49902674      | OPA1          | 321                  |
| gil156416003     | SDHA          | 318                  |
| gil801893        | LRPPRC        | 283                  |
| gil499719        | DLST          | 277                  |
| gil4929571       | SAMM50        | 276                  |
| gil62897195      | GLUD1         | 268                  |
| gil7242140       | CPLX          | 268                  |
| gil4503607       | EFTA          | 265                  |
| gil49456495      | PYCR1         | 258                  |
| gil224451073     | EXOG          | 252                  |
| gil74355155      | ALDH1L2       | 244                  |
| gil12751119      | PHB2          | 215                  |
| gil33636719      | TIMM44        | 213                  |
| gil1718502       | ACO2          | 212                  |
| gil20270303      | RHOT2         | 197                  |
| gil22202629      | AIFM1         | 194                  |
| gil28575023      | MRPL43        | 190                  |
| gil32483377      | PRDX3         | 185                  |
| gil163644321     | UQCRCF1       | 183                  |
| gil156142176     | TIMM21        | 178                  |
| gil12655193      | PCK2          | 177                  |
| gil27886570      | MRPL39        | 175                  |
| gil119607088     | PRKDC         | 175                  |
| gil4502491       | C1QBP (p32)   | 166                  |
| gil4557237       | ACAT1         | 158                  |

|              |         |     |
|--------------|---------|-----|
| gil12597661  | MRPL44  | 156 |
| gil11321583  | SUCLA2  | 151 |
| gil15553127  | HK2     | 149 |
| gil119587871 | NLRX1   | 142 |
| gil5174723   | TOMM40  | 139 |
| gil62896795  | NDUFS2  | 135 |
| gil5454122   | TIMM23  | 131 |
| gil4758774   | NDUFB10 | 129 |
| gil119568145 | MTHFD1L | 129 |
| gil21619683  | OPTN    | 125 |
| gil11545863  | MCCC2   | 123 |
| gil15080505  | CCDC51  | 123 |
| gil114325408 | IARS2   | 120 |
| gil2078327   | HADH    | 120 |
| gil38683855  | PTCD3   | 119 |
| gil25187965  | RHOT1   | 118 |
| gil151328807 | COX2    | 116 |
| gil30841303  | SOD2    | 114 |
| gil119599084 | GFM1    | 112 |
| gil188036020 | DDX3X   | 112 |
| gil31711992  | DLTA    | 110 |
| gil21687102  | TIMM14  | 110 |
| gil181238    | CYC1    | 109 |
| gil55663095  | HAX1    | 108 |
| gil550062    | RAB2A   | 107 |
| gil22027538  | PDCD61P | 107 |
| gil119603999 | NDUFA5  | 105 |
| gil4758152   | TIMM8   | 102 |
| gil119609244 | NDUFA9  | 102 |
| gil15213479  | POLDIP2 | 100 |
| gil46250003  | TMEM214 | 98  |
| gil11024700  | TIMM13  | 98  |
| gil141797011 | IQGAP1  | 97  |
| gil7661806   | MRPL15  | 96  |
| gil4557657   | ICT1    | 95  |
| gil21265040  | MRPL22  | 95  |
| gil180937    | COX5B   | 94  |
| gil4557353   | BCKDHB  | 94  |
| gil28422556  | SUCLG2  | 94  |
| gil15559568  | DNAJC11 | 93  |
| gil62088434  | ACAD9   | 89  |
| gil62202498  | UQCRH   | 88  |
| gil15342081  | MRPL38  | 86  |
| gil4507231   | SSBP1   | 85  |
| gil20631958  | BAX     | 83  |
| gil15778942  | NT5DC2  | 81  |
| gil223468571 | MRPL23  | 80  |
| gil11139093  | GRPEL1  | 80  |
| gil42542702  | CHCHD2  | 78  |

|              |              |    |
|--------------|--------------|----|
| gil5729937   | MTX2         | 76 |
| gil10947135  | ABCF1        | 75 |
| gil14250760  | PTRF         | 73 |
| gil112421122 | DNAJC13      | 73 |
| gil22902126  | PTK7         | 72 |
| gil110169703 | ND5          | 72 |
| gil40225932  | DNAJA3       | 70 |
| gil14150134  | CHCHD6       | 70 |
| gil22547136  | MRPL4        | 70 |
| gil116283278 | TFB1M        | 70 |
| gil4758138   | DDX5         | 70 |
| gil1263008   | ALDH1B1      | 69 |
| gil14124984  | CCT3         | 65 |
| gil181486    | YBX1         | 64 |
| gil7706351   | PTRH2        | 63 |
| gil118142816 | MRPL1        | 60 |
| gil49457552  | FARS1        | 60 |
| gil21687127  | CCDC127      | 59 |
| gil48146471  | MRPL17       | 57 |
| gil21411521  | NDUFA10      | 56 |
| gil38569475  | MTX1         | 55 |
| gil40789249  | DARS         | 54 |
| gil7657369   | NDUFA8       | 54 |
| gil62089036  | CCT6A        | 54 |
| gil47115243  | TFAM         | 52 |
| gil70166645  | PUS1         | 51 |
| gil62988276  | MRPP3        | 51 |
| gil47678395  | DDX17        | 46 |
| gil34809544  | NDUFA13      | 45 |
| gil157384956 | NUBPL        | 43 |
| gil119627099 | MRPL37       | 43 |
| gil20336290  | DHX30        | 42 |
| gil311893396 | ATP5J2-PTCD1 | 39 |
| gil40226469  | PMPCB        | 28 |

Supplemental Figure 2:

| Accession number | Official name | LONP1-4D-KD<br>(PELLET)<br>Mascot score | CONTROL<br>(PELLET)<br>Mascot score | Score<br>ratio |
|------------------|---------------|-----------------------------------------|-------------------------------------|----------------|
| gil31621305      | LRPPRC        | 2167                                    | 690                                 | 3.14           |
| gil74355155      | ALDH1L2       | 1562                                    | N/A                                 | N/A            |
| gil21411235      | NDUFS1        | 1243                                    | 152                                 | 8.18           |
| gil20336290      | DHX30         | 1125                                    | 315                                 | 3.57           |
| gil36796743      | MTHFD1L       | 870                                     | 248                                 | 3.51           |
| gil1263008       | ALDH1B1       | 804                                     | 130                                 | 6.18           |
| gil20372922      | PNPT1         | 725                                     | 52                                  | 13.94          |
| gil373251164     | GLS           | 725                                     | 33                                  | 21.97          |
| gil12655193      | PCK2          | 720                                     | N/A                                 | N/A            |
| gil312812        | PCCB          | 699                                     | N/A                                 | N/A            |
| gil515634        | COREI         | 682                                     | 128                                 | 5.33           |
| gil119616108     | MRPS27        | 672                                     | 137                                 | 4.91           |
| gil21361322      | TUBB4A        | 659                                     | N/A                                 | N/A            |
| gil4503377       | DPYSL2        | 657                                     | 162                                 | 4.06           |
| gil119617634     | CCT2          | 450                                     | 78                                  | 5.77           |
| gil4503607       | ETFA          | 618                                     | 109                                 | 5.67           |
| gil4758788       | NDUFS3        | 531                                     | 148                                 | 3.59           |
| gil3184148       | NDUFV1        | 530                                     | N/A                                 | N/A            |
| gil347134        | SDHA          | 525                                     | 64                                  | 8.20           |
| gil1168056       | OAT           | 480                                     | N/A                                 | N/A            |
| gil55960510      | CCT3          | 142                                     | 47                                  | 3.02           |
| gil7242140       | CLPX          | 479                                     | N/A                                 | N/A            |
| gil509291        | ATP5F1        | 463                                     | 124                                 | 3.73           |
| gil49456495      | PYCR1         | 460                                     | 112                                 | 4.11           |
| gil187452        | MUT           | 456                                     | N/A                                 | N/A            |
| gil7661672       | POLDIP2       | 450                                     | N/A                                 | N/A            |
| gil4557235       | ACADVL        | 448                                     | 46                                  | 9.74           |
| gil12804973      | ELAC2         | 444                                     | N/A                                 | N/A            |
| gil51873036      | OGDH          | 439                                     | 57                                  | 7.70           |
| gil33350932      | DYNC1H1       | 434                                     | 79                                  | 5.49           |
| gil1082886       | TRAP1         | 430                                     | N/A                                 | N/A            |
| gil3342006       | PMPCB         | 428                                     | N/A                                 | N/A            |
| gil28178832      | IDH2          | 426                                     | 23                                  | 18.52          |
| gil4103602       | TIMM44        | 415                                     | 35                                  | 11.86          |
| gil11545863      | MCCC2         | 415                                     | N/A                                 | N/A            |

|              |           |     |     |       |
|--------------|-----------|-----|-----|-------|
| gil40789249  | DARS2     | 410 | 76  | 5.39  |
| gil14210536  | TUBB6     | 410 | N/A | N/A   |
| gil261399877 | CCT7      | 408 | 22  | 18.55 |
| gil34147676  | MTERFD1   | 397 | N/A | N/A   |
| gil3415109   | ERAL1     | 397 | N/A | N/A   |
| gil62897551  | MRPS7     | 393 | N/A | N/A   |
| gil12597661  | MRPL44    | 393 | 40  | 9.83  |
| gil62898103  | GOT2      | 391 | 99  | 3.95  |
| gil38683855  | PTCD3     | 389 | N/A | N/A   |
| gil1000704   | NNT       | 389 | N/A | N/A   |
| gil62988276  | MRPP3     | 388 | 57  | 6.81  |
| gil11596859  | MRPL17    | 381 | N/A | N/A   |
| gil15928608  | SLC25A6   | 377 | N/A | N/A   |
| gil45267832  | FASTKD2   | 377 | N/A | N/A   |
| gil22547134  | MRPL37    | 377 | N/A | N/A   |
| gil49168620  | ACO2      | 374 | N/A | N/A   |
| gil20070344  | TARS2     | 374 | N/A | N/A   |
| gil14043072  | HNRNPA2B1 | 371 | 117 | 3.17  |
| gil16950603  | MRPS35    | 368 | 44  | 8.36  |
| gil4502643   | CCT6A     | 363 | 46  | 7.89  |
| gil1922287   | ECHS1     | 362 | N/A | N/A   |
| gil40217812  | TBRG4     | 361 | N/A | N/A   |
| gil38492358  | PTCD1     | 294 | N/A | N/A   |
| gil18028283  | ACAD9     | 357 | 79  | 4.52  |
| gil50417352  | DPYSL3    | 356 | 66  | 5.39  |
| gil7661806   | MRPL15    | 348 | N/A | N/A   |
| gil14589864  | ASPH      | 117 | N/A | N/A   |
| gil21361454  | PYCR2     | 343 | 76  | 4.51  |
| gil187281    | HNRNPM    | 339 | 41  | 8.27  |
| gil71052166  | POLRMT    | 335 | 66  | 5.08  |
| gil189049    | NDUFA9    | 335 | 32  | 10.47 |
| gil180917    | SDHB      | 334 | N/A | N/A   |
| gil21626466  | MATR3     | 324 | 24  | 13.50 |
| gil14285174  | GFM1      | 322 | N/A | N/A   |
| gil9800545   | ACOT2     | 317 | N/A | N/A   |
| gil7661556   | TRUB2     | 316 | N/A | N/A   |
| gil4758118   | MRPS29    | 313 | 75  | 4.17  |
| gil119617482 | TSFM      | 312 | N/A | N/A   |
| gil57863257  | TCP1      | 310 | N/A | N/A   |
| gil12804225  | CCT5      | 304 | 76  | 4.00  |
| gil62896685  | RUVBL1    | 299 | 44  | 6.80  |

|              |          |     |     |       |
|--------------|----------|-----|-----|-------|
| gil9910244   | MRPS22   | 292 | N/A | N/A   |
| gil14150078  | NOA1     | 290 | N/A | N/A   |
| gil8923421   | SARS2    | 286 | N/A | N/A   |
| gil10864011  | SQRDL    | 286 | N/A | N/A   |
| gil509676    | ACAA2    | 275 | N/A | N/A   |
| gil211828181 | HNRNPL   | 273 | N/A | N/A   |
| gil40225932  | DNAJA3   | 272 | 70  | 3.89  |
| gil119573109 | COPA     | 271 | 30  | 9.03  |
| gil38569417  | ARS2     | 270 | N/A | N/A   |
| gil4557817   | OXCT1    | 267 | N/A | N/A   |
| gil184427    | HSPG2    | 267 | 44  | 6.07  |
| gil119606898 | PITRM1   | 261 | N/A | N/A   |
| gil116283278 | TFB1     | 260 | 57  | 4.56  |
| gil12584221  | DDX28    | 257 | N/A | N/A   |
| gil5106956   | FHOD1    | 255 | 69  | 3.70  |
| gil38649415  | SRPRB    | 253 | 78  | 3.24  |
| gil379317177 | DDX21    | 248 | 36  | 6.89  |
| gil4506103   | EIF2AK2  | 247 | 71  | 3.48  |
| gil119595266 | CLPB     | 245 | 67  | 3.66  |
| gil387011    | PDHA1    | 244 | 54  | 4.52  |
| gil32358     | HNRNPU   | 244 | 23  | 10.61 |
| gil55769543  | MRPL14   | 242 | N/A | N/A   |
| gil21361331  | CPS1     | 236 | N/A | N/A   |
| gil4826649   | MRPL49   | 232 | N/A | N/A   |
| gil70995422  | NQO1     | 227 | 32  | 7.09  |
| gil37572267  | TRMT10C  | 224 | N/A | N/A   |
| gil4885377   | HIST1H1D | 222 | N/A | N/A   |
| gil22547140  | MRPL4    | 152 | N/A | N/A   |
| gil181575    | DLD      | 219 | 57  | 3.84  |
| gil285945    | MRPL19   | 219 | N/A | N/A   |
| gil119597555 | TFB2M    | 210 | N/A | N/A   |
| gil16554607  | MRPS10   | 209 | N/A | N/A   |
| gil5031877   | LMNB1    | 209 | N/A | N/A   |
| gil24308400  | MCU      | 209 | N/A | N/A   |
| gil10437178  | MRPL1    | 206 | N/A | N/A   |
| gil62897643  | MTHFD2   | 205 | N/A | N/A   |
| gil14028877  | MRPS25   | 205 | N/A | N/A   |
| gil40254986  | HSDL2    | 204 | 55  | 3.71  |
| gil119582537 | ETF1     | 202 | N/A | N/A   |
| gil13559363  | MRPL9    | 200 | N/A | N/A   |
| gil211904152 | SERPINE2 | 198 | N/A | N/A   |

|              |         |     |     |      |
|--------------|---------|-----|-----|------|
| gil48145545  | NDUFA6  | 193 | N/A | N/A  |
| gil7662645   | MRPS18B | 192 | N/A | N/A  |
| gil15721937  | MRPS24  | 191 | N/A | N/A  |
| gil116063536 | COQ5    | 191 | N/A | N/A  |
| gil11139093  | GRPEL1  | 190 | N/A | N/A  |
| gil7705626   | MRPS16  | 189 | N/A | N/A  |
| gil34740329  | HNRNPA3 | 186 | N/A | N/A  |
| gil29126836  | MRPS9   | 185 | 44  | 4.20 |
| gil28277071  | IPO5    | 181 | N/A | N/A  |
| gil3941724   | EIF4G1  | 179 | 50  | 3.58 |
| gil2737886   | IDH3B   | 176 | N/A | N/A  |
| gil7705851   | CHCHD2  | 175 | N/A | N/A  |
| gil7022287   | IARS2   | 174 | N/A | N/A  |
| gil7705618   | MRPL11  | 172 | 51  | 3.37 |
| gil4505571   | SQSTM1  | 172 | 55  | 3.13 |
| gil15011974  | ARHGEF2 | 171 | 45  | 3.80 |
| gil4505371   | NDUFS8  | 171 | 36  | 4.75 |
| gil968888    | HMGB1   | 171 | 40  | 4.28 |
| gil3342734   | NDUFS7  | 168 | N/A | N/A  |
| gil7661548   | MMADHC  | 168 | N/A | N/A  |
| gil5453555   | RAN     | 168 | 49  | 3.43 |
| gil3540239   | NDUFS2  | 165 | N/A | N/A  |
| gil14149738  | NLN     | 164 | N/A | N/A  |
| gil21265040  | MRPL22  | 163 | N/A | N/A  |
| gil11141903  | FASTKD5 | 163 | N/A | N/A  |
| gil27886570  | MRPL39  | 160 | N/A | N/A  |
| gil56205490  | ACADM   | 158 | N/A | N/A  |
| gil5931600   | PPA2    | 157 | N/A | N/A  |
| gil4826848   | NDUFA5  | 157 | N/A | N/A  |
| gil20149633  | ECSIT   | 157 | N/A | N/A  |
| gil18314586  | MRPS31  | 154 | N/A | N/A  |
| gil119588675 | METTL15 | 153 | N/A | N/A  |
| gil28872734  | MRPL43  | 153 | N/A | N/A  |
| gil4758138   | DDX5    | 152 | N/A | N/A  |
| gil41327781  | NDUFAF3 | 149 | N/A | N/A  |
| gil119598593 | AHSG    | 144 | N/A | N/A  |
| gil26051229  | MRPL28  | 143 | N/A | N/A  |
| gil11321601  | PFKP    | 143 | 31  | 4.61 |
| gil78070334  | GTPBP10 | 140 | N/A | N/A  |
| gil28212272  | NOP9    | 140 | 43  | 3.26 |
| gil6274550   | NDUFB9  | 138 | N/A | N/A  |



|              |          |     |     |      |
|--------------|----------|-----|-----|------|
| gil4557657   | ICT1     | 138 | N/A | N/A  |
| gil21265080  | MRPL18   | 137 | N/A | N/A  |
| gil34709     | SOD2     | 136 | N/A | N/A  |
| gil8922625   | TMLHE    | 136 | N/A | N/A  |
| gil511635    | ECI1     | 136 | N/A | N/A  |
| gil5453832   | HYOU1    | 136 | 38  | 3.58 |
| gil179360    | BCKDHA   | 136 | N/A | N/A  |
| gil27597059  | DNAJC9   | 135 | N/A | N/A  |
| gil40254992  | CBR4     | 135 | N/A | N/A  |
| gil56549685  | GTPBP8   | 134 | N/A | N/A  |
| gil119625894 | PAICS    | 132 | N/A | N/A  |
| gil13654278  | SLIRP    | 132 | 20  | 6.60 |
| gil38648667  | FASN     | 129 | N/A | N/A  |
| gil23308697  | SRPR     | 127 | 42  | 3.02 |
| gil39725942  | TWINKLE  | 126 | 20  | 6.30 |
| gil157426893 | GUF1     | 123 | 28  | 4.39 |
| gil292029    | FPGS     | 121 | N/A | N/A  |
| gil292830    | TOP2A    | 120 | N/A | N/A  |
| gil4732024   | PDSS1    | 115 | N/A | N/A  |
| gil16554604  | MRPS23   | 115 | N/A | N/A  |
| gil23273479  | MTG1     | 114 | N/A | N/A  |
| gil119611391 | MRPS14   | 114 | N/A | N/A  |
| gil42518070  | TJP2     | 114 | N/A | N/A  |
| gil5453918   | SLC25A17 | 112 | N/A | N/A  |
| gil7657118   | GCAT     | 112 | N/A | N/A  |
| gil7661730   | MRPS28   | 110 | N/A | N/A  |
| gil793763    | MMP14    | 109 | N/A | N/A  |
| gil24308117  | MTG2     | 108 | N/A | N/A  |
| gil3493529   | H2AFY    | 108 | N/A | N/A  |
| gil21265070  | MRPL2    | 108 | N/A | N/A  |
| gil444646    | APP      | 108 | N/A | N/A  |
| gil22035588  | MRPL24   | 107 | N/A | N/A  |
| gil695360    | COX5A    | 106 | 20  | 5.30 |
| gil223468571 | MRPL23   | 106 | N/A | N/A  |
| gil288563    | ITIH3    | 104 | N/A | N/A  |
| gil6912292   | CBX5     | 104 | N/A | N/A  |
| gil13654274  | FAHD1    | 104 | N/A | N/A  |
| gil62898171  | LCP1     | 103 | 18  | 5.72 |
| gil14141157  | HNRNPH3  | 102 | N/A | N/A  |
| gil14602703  | BCKDK    | 101 | 15  | 6.73 |
| gil18079218  | OSBPL8   | 101 | 30  | 3.37 |

|              |         |    |     |      |
|--------------|---------|----|-----|------|
| gil31652228  | MRPL21  | 99 | N/A | N/A  |
| gil37594471  | HIBCH   | 97 | N/A | N/A  |
| gil62088696  | SRSF1   | 96 | N/A | N/A  |
| gil28839782  | COX4L1  | 96 | N/A | N/A  |
| gil14602513  | MRPL48  | 96 | N/A | N/A  |
| gil16877964  | IVD     | 95 | N/A | N/A  |
| gil7705369   | COPB1   | 94 | N/A | N/A  |
| gil62898139  | GJA1    | 92 | N/A | N/A  |
| gil48146851  | IPO4    | 91 | N/A | N/A  |
| gil48976061  | ACAD10  | 91 | N/A | N/A  |
| gil22749443  | MICU2   | 91 | N/A | N/A  |
| gil40255109  | GRPEL2  | 90 | N/A | N/A  |
| gil62420877  | ETFB    | 90 | N/A | N/A  |
| gil1292941   | HMGCL2  | 89 | N/A | N/A  |
| gil4826862   | NME4    | 88 | N/A | N/A  |
| gil3249735   | KIFC3   | 88 | N/A | N/A  |
| gil8922631   | EXD2    | 88 | N/A | N/A  |
| gil181238    | CYC1    | 87 | 28  | 3.11 |
| gil180937    | COX5B   | 87 | N/A | N/A  |
| gil21040371  | DDX39A  | 86 | N/A | N/A  |
| gil55665272  | MGST3   | 85 | N/A | N/A  |
| gil119622401 | MRPL46  | 85 | N/A | N/A  |
| gil21618497  | MRPL47  | 84 | N/A | N/A  |
| gil21265096  | MRPL50  | 84 | N/A | N/A  |
| gil8922534   | RNMTL1  | 83 | N/A | N/A  |
| gil4758792   | NDUFS6  | 83 | N/A | N/A  |
| gil19923640  | GFM2    | 83 | N/A | N/A  |
| gil14269586  | MRPS26  | 83 | N/A | N/A  |
| gil6959304   | MYBBP1A | 82 | N/A | N/A  |
| gil10092657  | NDUFA12 | 82 | N/A | N/A  |
| gil9719409   | PDSS2   | 82 | N/A | N/A  |
| gil18375501  | APEX1   | 81 | N/A | N/A  |
| gil62088544  | DIAPH1  | 81 | N/A | N/A  |
| gil119591303 | TRIP12  | 81 | N/A | N/A  |
| gil56605994  | CISD2   | 80 | N/A | N/A  |
| gil34783041  | MRPS5   | 80 | N/A | N/A  |
| gil30524     | DLAT    | 80 | N/A | N/A  |
| gil51476873  | MCCC1   | 79 | N/A | N/A  |
| gil119580947 | LASPI   | 79 | N/A | N/A  |
| gil913393    | KPNA1   | 78 | N/A | N/A  |
| gil61835204  | MPST    | 78 | N/A | N/A  |

|              |            |    |     |      |
|--------------|------------|----|-----|------|
| gil16877641  | PRRC1      | 78 | N/A | N/A  |
| gil15489339  | VASN       | 78 | N/A | N/A  |
| gil72534692  | NT5DC3     | 78 | N/A | N/A  |
| gil4506001   | PPOX       | 77 | N/A | N/A  |
| gil71680896  | COX7A2     | 77 | N/A | N/A  |
| gil4099880   | MYO5A      | 77 | 18  | 4.28 |
| gil4503915   | GART       | 76 | N/A | N/A  |
| gil14044070  | DDRGK1     | 76 | N/A | N/A  |
| gil124297151 | LARS       | 76 | N/A | N/A  |
| gil38176424  | CUL4B      | 76 | N/A | N/A  |
| gil12803113  | TUFM       | 76 | N/A | N/A  |
| gil32528306  | RFC1       | 76 | N/A | N/A  |
| gil20149688  | TRMT2B     | 75 | N/A | N/A  |
| gil12804901  | IDH3G      | 73 | N/A | N/A  |
| gil31543415  | GADD45GIP1 | 73 | N/A | N/A  |
| gil21619683  | OPTN       | 72 | N/A | N/A  |
| gil119582193 | ABLIM3     | 72 | N/A | N/A  |
| gil16554609  | MRPS11     | 72 | N/A | N/A  |
| gil122937211 | ECM29      | 71 | N/A | N/A  |
| gil41388987  | RPUSD3     | 71 | N/A | N/A  |
| gil4505621   | PEBP1      | 71 | N/A | N/A  |
| gil55961491  | MTO1       | 70 | N/A | N/A  |
| gil124378039 | SEC16A     | 70 | N/A | N/A  |
| gil333470683 | MRPL45     | 69 | N/A | N/A  |
| gil70166599  | PUS1       | 68 | N/A | N/A  |
| gil119601354 | RDH11      | 68 | N/A | N/A  |
| gil2624702   | SSBP1      | 49 | N/A | N/A  |

Supplemental Figure 3:

| Accession number | Official name | MPP $\beta$<br>Mascot<br>score | Control<br>Mascot<br>score | Score ratio |
|------------------|---------------|--------------------------------|----------------------------|-------------|
| gil94538354      | PMPCB         | 1953                           | 39                         | 50.08       |
| gil74746874      | CDC42BPA      | 1068                           | #N/A                       | #N/A        |
| gil67678154      | RPS9          | 434                            | #N/A                       | #N/A        |
| gil729475        | FEN1          | 398                            | #N/A                       | #N/A        |
| gil62906882      | ATP5L         | 346                            | 53                         | 6.53        |
| gil83305924      | TIMM50        | 310                            | 36                         | 8.61        |
| gil84708830      | TUBB6         | 309                            | #N/A                       | #N/A        |
| gil62822438      | AGPS          | 303                            | #N/A                       | #N/A        |
| gil83318181      | LONP1         | 286                            | 120                        | 2.38        |
| gil62897685      | TIMM44        | 282                            | #N/A                       | #N/A        |
| gil54696944      | RPL10a        | 275                            | 20                         | 13.75       |
| gil987870        | OAPB          | 254                            | #N/A                       | #N/A        |
| gil78099790      | PLOD1         | 247                            | #N/A                       | #N/A        |
| gil83755037      | ACAT1         | 236                            | #N/A                       | #N/A        |
| gil7670842       | ECI2          | 218                            | #N/A                       | #N/A        |
| gil62945797      | H2AFX         | 211                            | #N/A                       | #N/A        |
| gil578798836     | MACF1         | 204                            | #N/A                       | #N/A        |
| gil74355155      | ALDH1L2       | 192                            | #N/A                       | #N/A        |
| gil74733765      | NT5DC2        | 180                            | #N/A                       | #N/A        |
| gil94730427      | SUCLA2        | 177                            | #N/A                       | #N/A        |
| gil94721261      | CNP           | 159                            | #N/A                       | #N/A        |
| gil62422557      | PAK4          | 154                            | #N/A                       | #N/A        |
| gil74733244      | APOO          | 133                            | #N/A                       | #N/A        |
| gil71151875      | COX20         | 131                            | #N/A                       | #N/A        |
| gil74759261      | PXK           | 125                            | 19                         | 6.58        |
| gil7705618       | MRPL11        | 116                            | #N/A                       | #N/A        |
| gil9665218       | CLPX          | 115                            | #N/A                       | #N/A        |
| gil790447        | ACADV1        | 114                            | #N/A                       | #N/A        |
| gil7023534       | AK3           | 113                            | #N/A                       | #N/A        |
| gil74750555      | PTRH1         | 112                            | #N/A                       | #N/A        |
| gil58257735      | ARHGEF2       | 110                            | #N/A                       | #N/A        |
| gil74762790      | FADS3         | 99                             | #N/A                       | #N/A        |
| gil68533031      | FASN          | 96                             | #N/A                       | #N/A        |
| gil86197962      | FLOT1         | 95                             | #N/A                       | #N/A        |
| gil7706349       | MRPS33        | 94                             | #N/A                       | #N/A        |
| gil68052264      | UFL1          | 93                             | #N/A                       | #N/A        |
| gil7920147       | NSF           | 86                             | #N/A                       | #N/A        |

|              |          |    |      |      |
|--------------|----------|----|------|------|
| gil83753568  | RAB18    | 86 | #N/A | #N/A |
| gil9247171   | FYN      | 85 | #N/A | #N/A |
| gil548937720 | IQGAP3   | 82 | #N/A | #N/A |
| gil83715985  | HSD17B10 | 78 | #N/A | #N/A |
| gil8923708   | FOXRED1  | 78 | #N/A | #N/A |
| gil571026676 | SLC39A7  | 75 | #N/A | #N/A |
| gil97046413  | CCDC93   | 73 | #N/A | #N/A |
| gil85701348  | FECH     | 72 | #N/A | #N/A |
| gil74762551  | ATAD1    | 71 | #N/A | #N/A |
| gil9755051   | TM9SF3   | 69 | #N/A | #N/A |
| gil62822421  | MAP4K4   | 68 | #N/A | #N/A |
| gil98986464  | TMED10   | 67 | #N/A | #N/A |
| gil9622124   | RDH11    | 66 | #N/A | #N/A |
| gil7657345   | MTCH1    | 65 | #N/A | #N/A |
| gil68299593  | JAK1     | 65 | #N/A | #N/A |
| gil81175200  | TALIN1   | 62 | #N/A | #N/A |
| gil74355449  | DPM3     | 61 | #N/A | #N/A |
| gil62897865  | MRPS11   | 61 | #N/A | #N/A |
| gil7705274   | ARMCX3   | 60 | #N/A | #N/A |
| gil8922601   | ARL8B    | 60 | #N/A | #N/A |
| gil6273493   | SPAST    | 60 | #N/A | #N/A |
| gil801893    | LRPPRC   | 60 | #N/A | #N/A |
| gil6980694   | 3HAD_B   | 59 | #N/A | #N/A |
| gil74749360  | MTHFD1L  | 59 | #N/A | #N/A |
| gil74761587  | CARS2    | 59 | #N/A | #N/A |
| gil64654324  | GNA11    | 58 | #N/A | #N/A |
| gil914935    | DAD-1    | 58 | #N/A | #N/A |
| gil8515718   | CALU     | 55 | #N/A | #N/A |
| gil8886871   | PLSCR1   | 55 | #N/A | #N/A |
| gil578804559 | DOCK10   | 55 | #N/A | #N/A |
| gil91208273  | D2HGDH   | 53 | #N/A | #N/A |
| gil8650412   | ABCB10   | 53 | #N/A | #N/A |
| gil7023042   | ELOVL1   | 53 | #N/A | #N/A |
| gil8923565   | AURKAIP1 | 52 | #N/A | #N/A |
| gil8922511   | MRPS18A  | 52 | #N/A | #N/A |
| gil7688673   | RTCB     | 52 | #N/A | #N/A |
| gil578815274 | SLC39A14 | 52 | #N/A | #N/A |
| gil7705805   | MRPS2    | 52 | #N/A | #N/A |
| gil84105433  | GNA12    | 49 | #N/A | #N/A |
| gil62089396  | MRPS15   | 42 | #N/A | #N/A |
| gil90112017  | PMPCA    | 24 | #N/A | #N/A |
